# Supplementary material
Source: PubMed Central journal article supplement (PMC3660676)

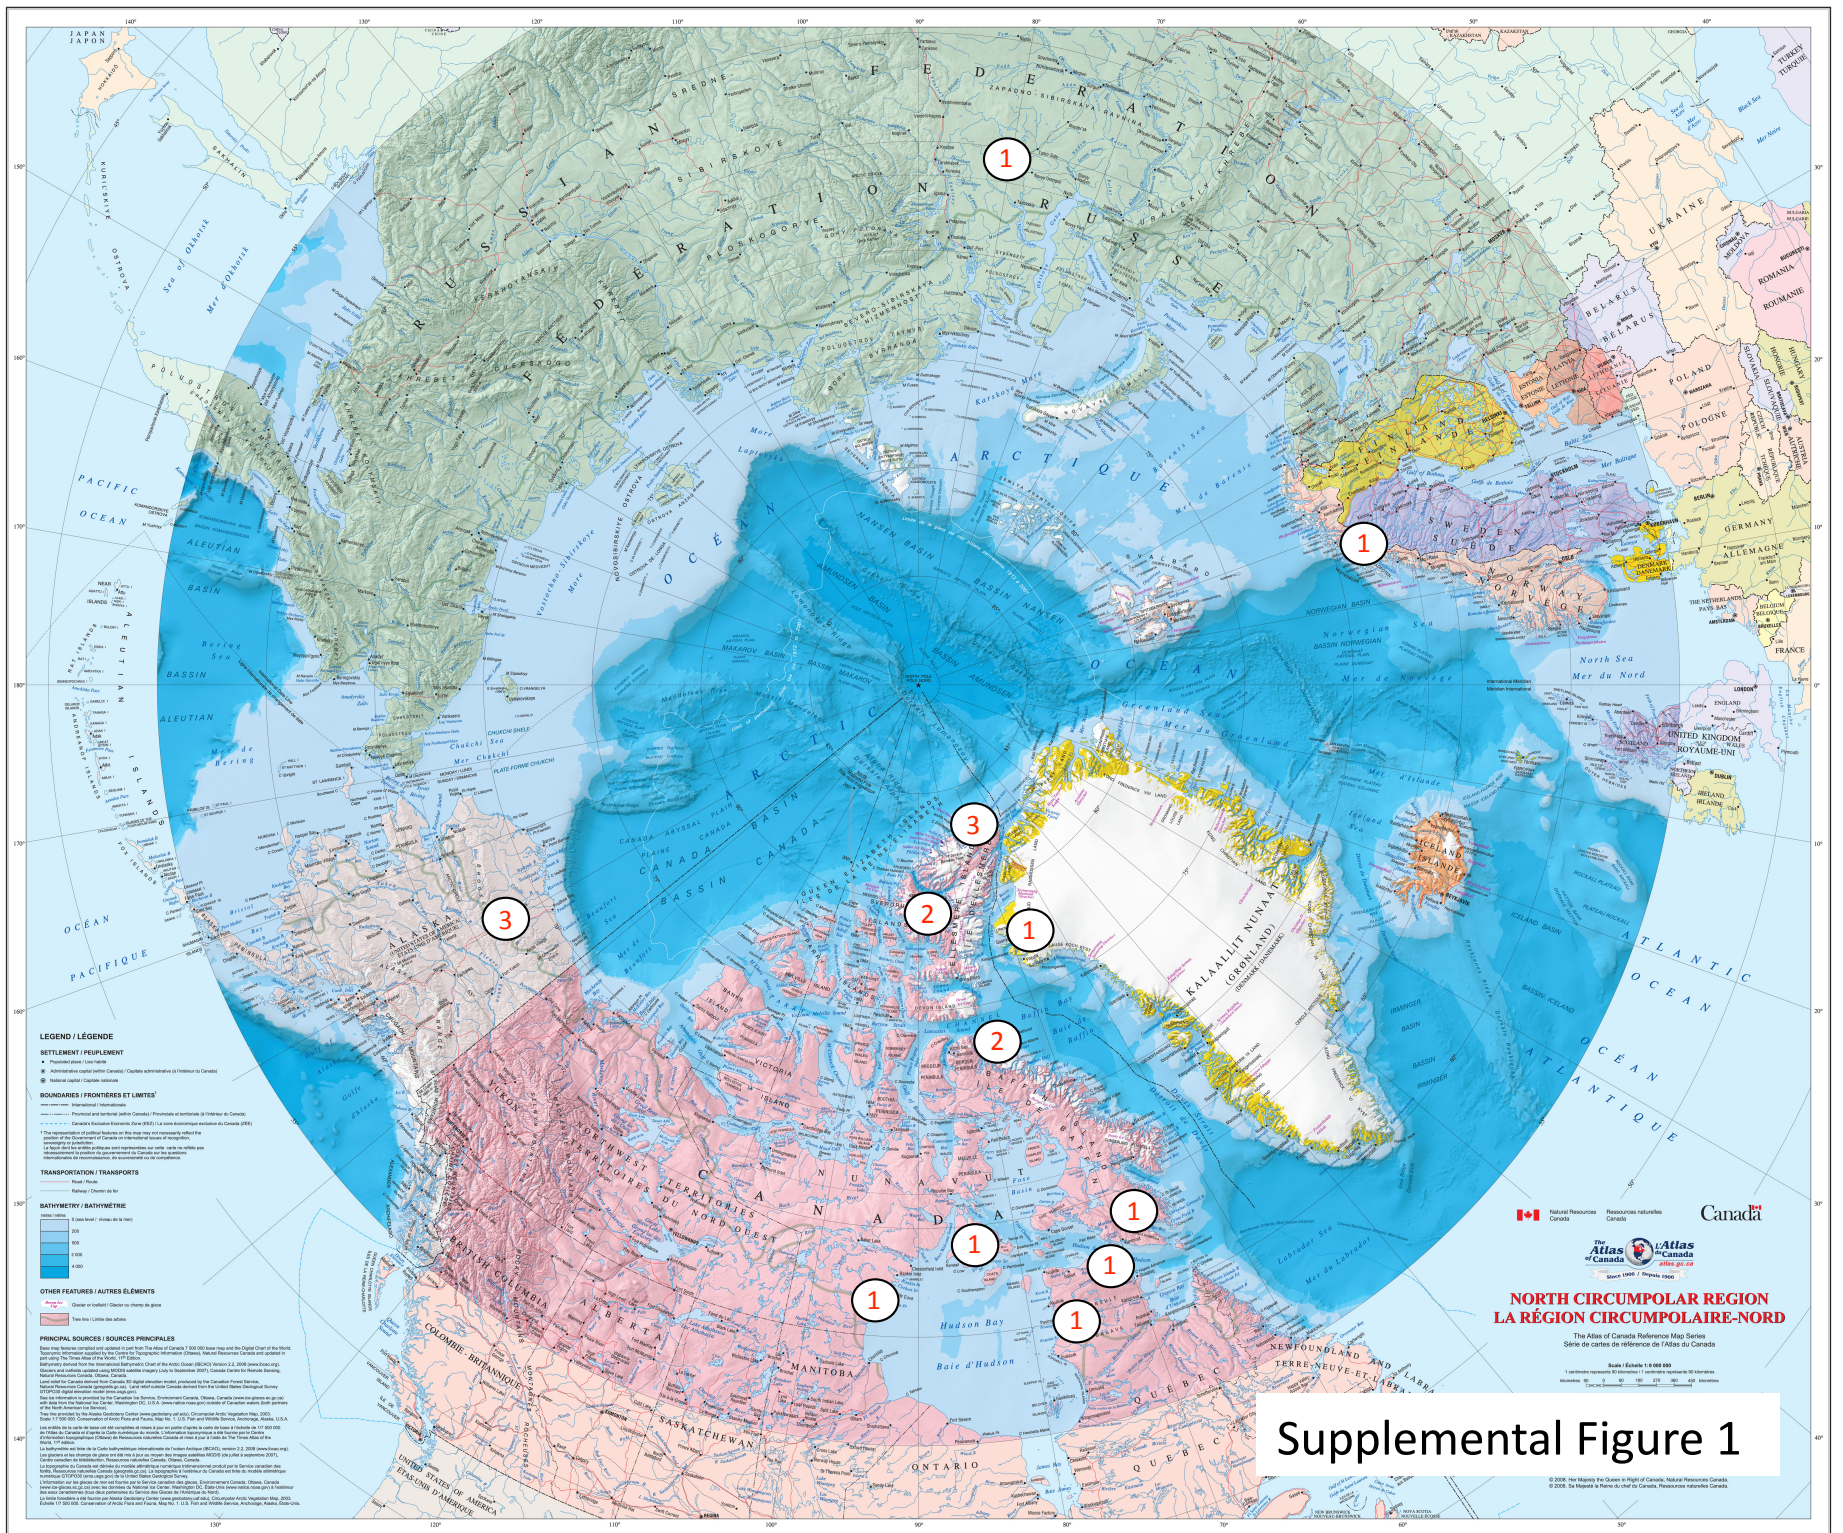

Supplemental Figure 1

Supplement: ismej20131x2.pdf [file ismej20131x2.pdf]
